# Supplementary material
Source: HighWire-hosted journal article supplement (https://bmjopen.bmj.com/content/9/12/e034654)
Supplement: inline-supplementary-material-1 [file inline-supplementary-material-1.pdf]

## Medline Search Strategy

#      **Searches**

- 1      exp Brain Injuries/
- 2      exp Head Injuries, Penetrating/
- 3      exp Cerebral Hemorrhage/
- 4      (brain injur\* or intracranial injur\*).mp. [mp=title, abstract, original title, name of substance word, subject heading word, floating sub-heading word, keyword heading word, organism supplementary concept word, protocol supplementary concept word, rare disease supplementary concept word, unique identifier, synonyms]
- 5      (TBI or ABI).mp. [mp=title, abstract, original title, name of substance word, subject heading word, floating sub-heading word, keyword heading word, organism supplementary concept word, protocol supplementary concept word, rare disease supplementary concept word, unique identifier, synonyms]
- 6      exp Cognition Disorders/ or exp Cognitive Dysfunction/
- 7      (cognitive impairment or cognitive disab\*or acquired disab\*or communication disab\*).mp. [mp=title, abstract, original title, name of substance word, subject heading word, floating sub-heading word, keyword heading word, organism supplementary concept word, protocol supplementary concept word, rare disease supplementary concept word, unique identifier, synonyms]
- 8      (severe disab\* or profound disab\*).mp. [mp=title, abstract, original title, name of substance word, subject heading word, floating sub-heading word, keyword heading word, organism supplementary concept word, protocol supplementary concept word, rare disease supplementary concept word, unique identifier, synonyms]
- 9      exp Multiple Sclerosis/
- 10     exp Cerebral Palsy/
- 11     exp Stroke/
- 12     young adult.mp. [mp=title, abstract, original title, name of substance word, subject heading word, floating sub-heading word, keyword heading word, organism

- supplementary concept word, protocol supplementary concept word, rare disease  
supplementary concept word, unique identifier, synonyms]
- 13 11 and 12
- 14 (stroke and young adult).mp. [mp=title, abstract, original title, name of substance  
word, subject heading word, floating sub-heading word, keyword heading word,  
organism supplementary concept word, protocol supplementary concept word, rare  
disease supplementary concept word, unique identifier, synonyms]
- 15 multiple sclerosis.mp. [mp=title, abstract, original title, name of substance word,  
subject heading word, floating sub-heading word, keyword heading word, organism  
supplementary concept word, protocol supplementary concept word, rare disease  
supplementary concept word, unique identifier, synonyms]
- 16 cerebral palsy.mp. [mp=title, abstract, original title, name of substance word, subject  
heading word, floating sub-heading word, keyword heading word, organism  
supplementary concept word, protocol supplementary concept word, rare disease  
supplementary concept word, unique identifier, synonyms]
- 17 huntington's disease.mp. or exp Huntington Disease/
- 18 exp Spinal Cord Injuries/
- 19 spinal cord injur\*.mp. [mp=title, abstract, original title, name of substance word,  
subject heading word, floating sub-heading word, keyword heading word, organism  
supplementary concept word, protocol supplementary concept word, rare disease  
supplementary concept word, unique identifier, synonyms]
- 20 1 or 2 or 3 or 4 or 5 or 6 or 7 or 8 or 9 or 10 or 13 or 14 or 15 or 16 or 17 or 18 or 19
- 21 disability support.mp. [mp=title, abstract, original title, name of substance word,  
subject heading word, floating sub-heading word, keyword heading word, organism  
supplementary concept word, protocol supplementary concept word, rare disease  
supplementary concept word, unique identifier, synonyms]
- 22 disability work\*.mp. [mp=title, abstract, original title, name of substance word,  
subject heading word, floating sub-heading word, keyword heading word, organism  
supplementary concept word, protocol supplementary concept word, rare disease  
supplementary concept word, unique identifier, synonyms]

- 23 support work\*.mp. [mp=title, abstract, original title, name of substance word, subject heading word, floating sub-heading word, keyword heading word, organism supplementary concept word, protocol supplementary concept word, rare disease supplementary concept word, unique identifier, synonyms]
- 24 attendant care\*.mp. [mp=title, abstract, original title, name of substance word, subject heading word, floating sub-heading word, keyword heading word, organism supplementary concept word, protocol supplementary concept word, rare disease supplementary concept word, unique identifier, synonyms]
- 25 paid care\*.mp. [mp=title, abstract, original title, name of substance word, subject heading word, floating sub-heading word, keyword heading word, organism supplementary concept word, protocol supplementary concept word, rare disease supplementary concept word, unique identifier, synonyms]
- 26 paid support\*.mp. [mp=title, abstract, original title, name of substance word, subject heading word, floating sub-heading word, keyword heading word, organism supplementary concept word, protocol supplementary concept word, rare disease supplementary concept word, unique identifier, synonyms]
- 27 support staff.mp. [mp=title, abstract, original title, name of substance word, subject heading word, floating sub-heading word, keyword heading word, organism supplementary concept word, protocol supplementary concept word, rare disease supplementary concept word, unique identifier, synonyms]
- 28 care assistant.mp. [mp=title, abstract, original title, name of substance word, subject heading word, floating sub-heading word, keyword heading word, organism supplementary concept word, protocol supplementary concept word, rare disease supplementary concept word, unique identifier, synonyms]
- 29 direct support\*.mp. [mp=title, abstract, original title, name of substance word, subject heading word, floating sub-heading word, keyword heading word, organism supplementary concept word, protocol supplementary concept word, rare disease supplementary concept word, unique identifier, synonyms]
- 30 home care\*.mp. [mp=title, abstract, original title, name of substance word, subject heading word, floating sub-heading word, keyword heading word, organism supplementary concept word, protocol supplementary concept word, rare disease supplementary concept word, unique identifier, synonyms]

- 31 professional support\*.mp. [mp=title, abstract, original title, name of substance word, subject heading word, floating sub-heading word, keyword heading word, organism supplementary concept word, protocol supplementary concept word, rare disease supplementary concept word, unique identifier, synonyms]
- 32 active support\*.mp. [mp=title, abstract, original title, name of substance word, subject heading word, floating sub-heading word, keyword heading word, organism supplementary concept word, protocol supplementary concept word, rare disease supplementary concept word, unique identifier, synonyms]
- 33 (quality adj2 support).mp. [mp=title, abstract, original title, name of substance word, subject heading word, floating sub-heading word, keyword heading word, organism supplementary concept word, protocol supplementary concept word, rare disease supplementary concept word, unique identifier, synonyms]
- 34 (quality adj2 care).mp. [mp=title, abstract, original title, name of substance word, subject heading word, floating sub-heading word, keyword heading word, organism supplementary concept word, protocol supplementary concept word, rare disease supplementary concept word, unique identifier, synonyms]
- 35 home health aide.mp. [mp=title, abstract, original title, name of substance word, subject heading word, floating sub-heading word, keyword heading word, organism supplementary concept word, protocol supplementary concept word, rare disease supplementary concept word, unique identifier, synonyms]
- 36 21 or 22 or 23 or 24 or 25 or 26 or 27 or 28 or 29 or 30 or 31 or 32 or 33 or 34 or 35
- 37 20 and 36
- 38 limit 37 to (english language and yr="2009 -Current")
- 39 social care
- 40 36 or 39
- 41 20 and 40
- 42 limit 41 to (english language and yr="2009 -Current")
